# Supplementary material for: CYP2D6-inhibiting drugs and risk of fall injuries after newly initiated antidepressant and antipsychotic therapy in a Swedish, register-based case-crossover study
Source: PubMed Central journal article supplement (PMC7970948; doi:10.1038/s41598-021-85022-x), 2021-03-11
Supplement: 41598_2021_85022_MOESM1_ESM.pdf [file 41598_2021_85022_MOESM1_ESM.pdf]

Supplementary 1 (A). Use of antidepressant substances stratified for men and women in 10-year age groups.

| ATC code                    | Antidepressants |             |               | 20-29 years |       | 30-39 years |       | 40-49 years |       | 50-59 years |       | 60-69 years |       | 70-79 years |       | 80-89 years |       | 90- years |       |  |  |
|-----------------------------|-----------------|-------------|---------------|-------------|-------|-------------|-------|-------------|-------|-------------|-------|-------------|-------|-------------|-------|-------------|-------|-----------|-------|--|--|
|                             |                 | Men (total) | Women (total) | Men         | Women | Men         | Women | Men         | Women | Men         | Women | Men         | Women | Men         | Women | Men         | Women | Men       | Women |  |  |
| <b>SSRI</b>                 |                 |             |               |             |       |             |       |             |       |             |       |             |       |             |       |             |       |           |       |  |  |
| N06AB03                     | Fluoxetine      | 30          | 81            | 4           | 5     | 4           | 6     | 5           | 12    | 5           | 6     | 5           | 14    | 3           | 17    | 4           | 15    | 0         | 6     |  |  |
| N06AB04                     | Citalopram      | 753         | 1780          | 6           | 5     | 15          | 14    | 19          | 36    | 36          | 73    | 87          | 168   | 190         | 387   | 324         | 792   | 76        | 305   |  |  |
| N06AB05                     | Paroxetine      | 35          | 100           | 1           | 2     | 5           | 3     | 2           | 22    | 9           | 15    | 5           | 25    | 6           | 28    | 3           | 5     | 4         | 0     |  |  |
| N06AB10                     | Escitalopram    | 76          | 172           | 1           | 4     | 3           | 8     | 4           | 8     | 10          | 16    | 12          | 28    | 14          | 38    | 27          | 63    | 5         | 7     |  |  |
| <b>Total</b>                |                 | <b>893</b>  | <b>2133</b>   |             |       |             |       |             |       |             |       |             |       |             |       |             |       |           |       |  |  |
| N06AB06                     | Sertraline      | 209         | 486           | 15          | 9     | 4           | 11    | 13          | 20    | 18          | 43    | 30          | 76    | 56          | 103   | 56          | 185   | 17        | 39    |  |  |
| <b>Tetracyclics</b>         |                 |             |               |             |       |             |       |             |       |             |       |             |       |             |       |             |       |           |       |  |  |
| N06AA21                     | Maprotiline     | 1           | 5             | 1           | 3     | 0           | 2     | 0           | 0     | 0           | 0     | 0           | 0     | 0           | 0     | 0           | 0     | 0         | 0     |  |  |
| N06AX03                     | Mianserin       | 20          | 51            | 4           | 1     | 1           | 3     | 4           | 5     | 4           | 4     | 6           | 12    | 1           | 17    | 0           | 9     | 0         | 0     |  |  |
| N06AX11                     | Mirtazapine     | 296         | 512           | 12          | 2     | 8           | 2     | 15          | 9     | 21          | 13    | 35          | 46    | 55          | 104   | 121         | 231   | 29        | 105   |  |  |
| <b>Total</b>                |                 | <b>317</b>  | <b>568</b>    |             |       |             |       |             |       |             |       |             |       |             |       |             |       |           |       |  |  |
| <b>Tricyclics</b>           |                 |             |               |             |       |             |       |             |       |             |       |             |       |             |       |             |       |           |       |  |  |
| N06AA04                     | Clomipramine    | 18          | 65            | 1           | 3     | 1           | 1     | 4           | 5     | 2           | 10    | 1           | 19    | 5           | 23    | 4           | 4     | 0         | 0     |  |  |
| N06AA06                     | Trimipramine    | 3           | 4             | 1           | 1     | 1           | 1     | 1           | 1     | 0           | 1     | 0           | 0     | 0           | 0     | 0           | 0     | 0         | 0     |  |  |
| N06AA09                     | Amitriptyline   | 112         | 305           | 1           | 2     | 4           | 9     | 9           | 11    | 7           | 19    | 19          | 32    | 24          | 71    | 42          | 127   | 6         | 34    |  |  |
| N06AA10                     | Nortriptyline   | 3           | 8             | 1           | 1     | 1           | 1     | 1           | 1     | 0           | 3     | 0           | 2     | 0           | 0     | 0           | 0     | 0         | 0     |  |  |
| <b>Total</b>                |                 | <b>136</b>  | <b>382</b>    |             |       |             |       |             |       |             |       |             |       |             |       |             |       |           |       |  |  |
| <b>SNRI</b>                 |                 |             |               |             |       |             |       |             |       |             |       |             |       |             |       |             |       |           |       |  |  |
| N06AX21                     | Duloxetine      | 29          | 66            | 3           | 2     | 4           | 10    | 4           | 4     | 1           | 15    | 4           | 15    | 6           | 18    | 7           | 2     | 0         | 0     |  |  |
| N06AX16                     | Venlafaxine     | 69          | 137           | 4           | 1     | 5           | 10    | 6           | 9     | 11          | 16    | 18          | 20    | 12          | 34    | 11          | 38    | 2         | 9     |  |  |
| <b>No CYP2D6 metabolism</b> |                 |             |               |             |       |             |       |             |       |             |       |             |       |             |       |             |       |           |       |  |  |
| N06AG02                     | Moclobemide     | 1           | 0             | 1           | 0     |             |       |             |       |             |       |             |       |             |       |             |       |           |       |  |  |
| N06AX12                     | Bupropion       | 20          | 19            | 1           | 3     | 1           | 6     | 1           | 5     | 4           | 2     | 8           | 3     | 3           | 0     | 2           | 0     | 0         | 0     |  |  |
| N06AX18                     | Reboxetine      | 4           | 8             | 1           | 1     | 2           | 2     | 1           | 3     | 0           | 1     | 9           | 1     | 0           | 0     | 0           | 0     | 0         | 0     |  |  |
| <b>Total</b>                |                 | <b>25</b>   | <b>27</b>     |             |       |             |       |             |       |             |       |             |       |             |       |             |       |           |       |  |  |

**Supplementary 1 (B). Use of antipsychotic substances stratified for men and women in 10-year age groups.**

| ATC code                                         | Antipsychotics   |             |               | 20-29 years |       | 30-39 years |       | 40-49 years |       | 50-59 years |       | 60-69 years |       | 70-79 years |       | 80-89 years |       | 90- years |       |  |  |
|--------------------------------------------------|------------------|-------------|---------------|-------------|-------|-------------|-------|-------------|-------|-------------|-------|-------------|-------|-------------|-------|-------------|-------|-----------|-------|--|--|
|                                                  |                  | Men (total) | Women (total) | Men         | Women | Men         | Women | Men         | Women | Men         | Women | Men         | Women | Men         | Women | Men         | Women | Men       | Women |  |  |
| <i>CYP2D6 metabolism with active metabolites</i> |                  |             |               |             |       |             |       |             |       |             |       |             |       |             |       |             |       |           |       |  |  |
| N05AX08                                          | Risperidone      | 159         | 304           | 1           | 1     | 1           | 1     | 4           | 4     | 9           | 13    | 32          | 57    | 81          | 145   | 31          | 83    | 0         | 0     |  |  |
| N05AX12                                          | Aripiprazole     | 7           | 11            | 1           | 1     | 1           | 1     | 1           | 2     | 1           | 2     | 2           | 4     | 1           | 1     | 0           | 0     | 0         | 0     |  |  |
| <b>Total</b>                                     |                  | <b>166</b>  | <b>315</b>    |             |       |             |       |             |       |             |       |             |       |             |       |             |       |           |       |  |  |
| <i>Major CYP2D6 metabolism</i>                   |                  |             |               |             |       |             |       |             |       |             |       |             |       |             |       |             |       |           |       |  |  |
| N05AB03                                          | Perphenazine     | 17          | 21            | 3           | 1     | 3           | 1     | 4           | 3     | 5           | 10    | 2           | 5     | 0           | 1     | 0           | 0     | 0         | 0     |  |  |
| <i>Partial CYP2D6 metabolism</i>                 |                  |             |               |             |       |             |       |             |       |             |       |             |       |             |       |             |       |           |       |  |  |
| N05AA01                                          | Chlorpromazine   | 1           | 1             | 1           | 1     | 0           | 0     | 0           | 0     | 0           | 0     | 0           | 0     | 0           | 0     | 0           | 0     | 0         | 0     |  |  |
| N05AD01                                          | Haloperidol      | 106         | 187           | 1           | 1     | 1           | 5     | 4           | 10    | 7           | 42    | 25          | 85    | 59          | 44    | 9           | 0     | 0         | 0     |  |  |
| N05AF05                                          | Zuclopenthixol   | 14          | 28            | 3           | 1     | 1           | 3     | 4           | 3     | 2           | 8     | 4           | 13    | 0           | 0     | 0           | 0     | 0         | 0     |  |  |
| <b>Total</b>                                     |                  | <b>121</b>  | <b>216</b>    |             |       |             |       |             |       |             |       |             |       |             |       |             |       |           |       |  |  |
| <i>No CYP2D6 metabolism</i>                      |                  |             |               |             |       |             |       |             |       |             |       |             |       |             |       |             |       |           |       |  |  |
| N05AA02                                          | Levomepromazine  | 37          | 45            | 2           | 3     | 1           | 1     | 1           | 5     | 5           | 4     | 5           | 9     | 10          | 7     | 13          | 10    | 0         | 6     |  |  |
| N05AB04                                          | Prochlorperazine | 7           | 24            | 1           | 1     | 1           | 1     | 2           | 4     | 3           | 4     | 0           | 9     | 0           | 5     | 0           | 0     | 0         | 0     |  |  |
| N05AD03                                          | Melperone        | 11          | 16            | 1           | 5     | 9           | 10    | 1           | 1     | 0           | 0     | 0           | 0     | 0           | 0     | 0           | 0     | 0         | 0     |  |  |
| N05AE04                                          | Ziprasidone      | 1           | 3             | 1           | 2     | 0           | 1     | 0           | 0     | 0           | 0     | 0           | 0     | 0           | 0     | 0           | 0     | 0         | 0     |  |  |
| N05AF01                                          | Flupentixol      | 12          | 34            | 1           | 2     | 1           | 5     | 2           | 5     | 2           | 11    | 4           | 7     | 2           | 4     | 0           | 0     | 0         | 0     |  |  |
| N05AF03                                          | Chlorprotixen    | 6           | 2             | 2           | 2     | 1           | 0     | 2           | 0     | 1           | 0     | 0           | 0     | 0           | 0     | 0           | 0     | 0         | 0     |  |  |
| N05AH02                                          | Clozapine        | 16          | 4             | 1           | 1     | 3           | 1     | 1           | 1     | 5           | 1     | 6           | 0     | 0           | 0     | 0           | 0     | 0         | 0     |  |  |
| N05AH03                                          | Olanzapine       | 48          | 73            | 4           | 1     | 7           | 5     | 6           | 2     | 6           | 4     | 8           | 10    | 6           | 21    | 8           | 19    | 3         | 11    |  |  |
| N05AH04                                          | Quetiapiine      | 29          | 35            | 1           | 1     | 1           | 2     | 2           | 1     | 1           | 3     | 16          | 4     | 7           | 14    | 1           | 8     | 0         | 2     |  |  |
| N05AX13                                          | Paliperidone     | 1           | 0             | 1           | 0     | 0           | 0     | 0           | 0     | 0           | 0     | 0           | 0     | 0           | 0     | 0           | 0     | 0         | 0     |  |  |
| <b>Total</b>                                     |                  | <b>162</b>  | <b>232</b>    |             |       |             |       |             |       |             |       |             |       |             |       |             |       |           |       |  |  |

|

|
